# Supplementary material for: Zero-dimensional organic–inorganic hybrid indium halide perovskite with broadband yellow light emission
Source: Royal Society of Chemistry journal article supplement (doi:10.1039/d4ce00895b), 2024-01-01
Supplement: d4ce00895b1.pdf [file d4ce00895b1.pdf]

# **Zero-Dimensional Organic-inorganic Hybrid Indium Halide Perovskite with Broadband Yellow Light Emission**

Qi Wang,<sup>ab</sup> Wei Jiang,<sup>a</sup> Peng-Yao Xuan,<sup>a</sup> Ke Zhao,<sup>a</sup> Xiu-Yue Fu,<sup>a</sup>  
Xiao-Rui Zhang,<sup>a</sup> Xiao-Wu Lei,<sup>a</sup> Cheng-Yang Yue,<sup>a\*</sup> Xiang-Wen  
Kong<sup>a\*</sup>

<sup>a</sup> Research institute of Optoelectronic Functional Materials, School of Chemistry, Chemical Engineer and Materials, Jining University, Qufu, Shandong, 273155, P. R. China

<sup>b</sup> School of Chemistry and Chemical Engineering, Qufu Normal University, Qufu, Shandong, 273165, P. R. China

*Corresponding Authors:* Cheng-Yang Yue; Xiang-Wen Kong

*E-mail:* yuechengyang@126.com; kongxiangwen@jnxu.edu.cn

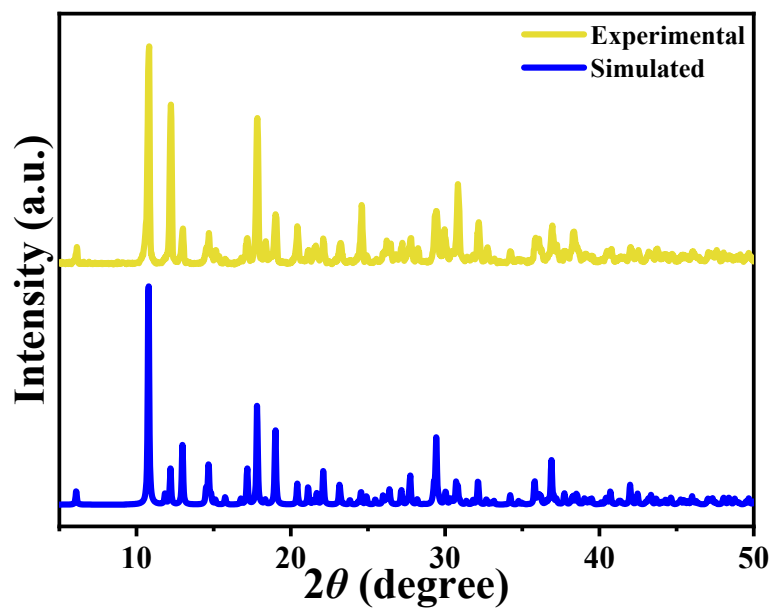

**Figure S1.** The simulated and experimental powder X-ray diffraction (PXRD) patterns of  $[1\text{-Me-Pipz}]_2[\text{InCl}_6]\text{Cl}\cdot\text{H}_2\text{O}$ .

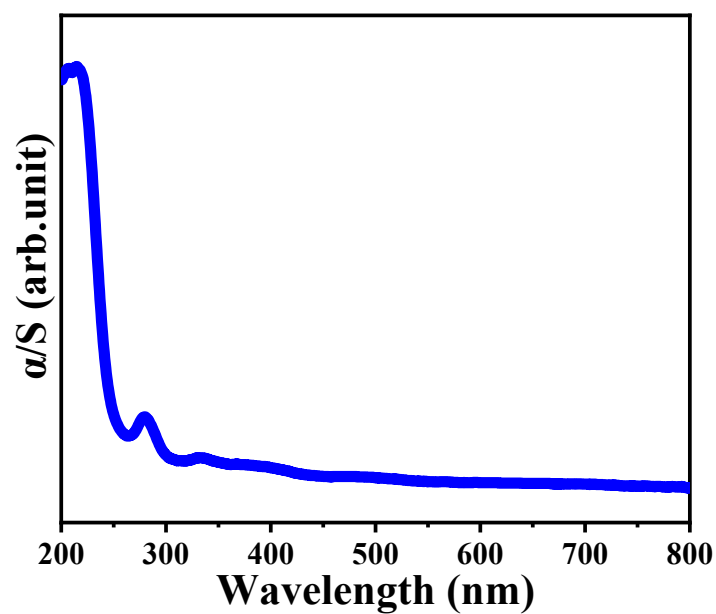

**Figure S2.** The UV-vis absorption spectrum of  $[1\text{-Me-Pipz}]_2[\text{InCl}_6]\text{Cl}\cdot\text{H}_2\text{O}$ .

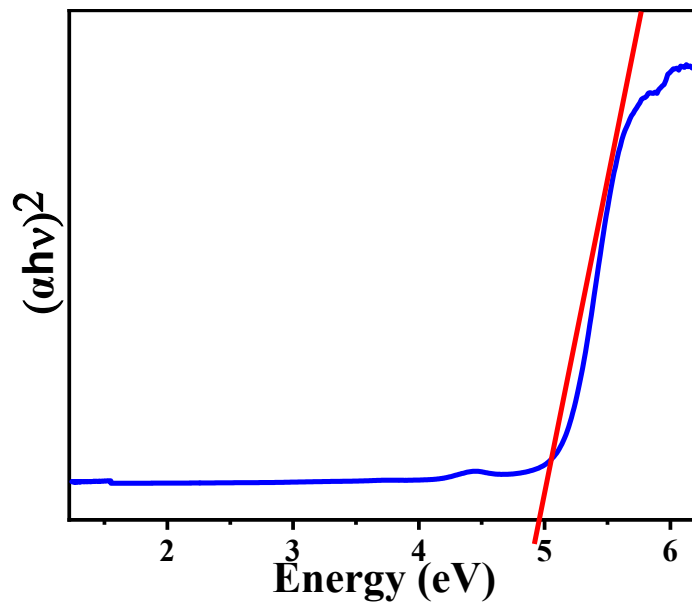

**Figure S3.** The Tauc's plot for  $[1\text{-Me-Pipz}]_2[\text{InCl}_6]\text{Cl}\cdot\text{H}_2\text{O}$ .

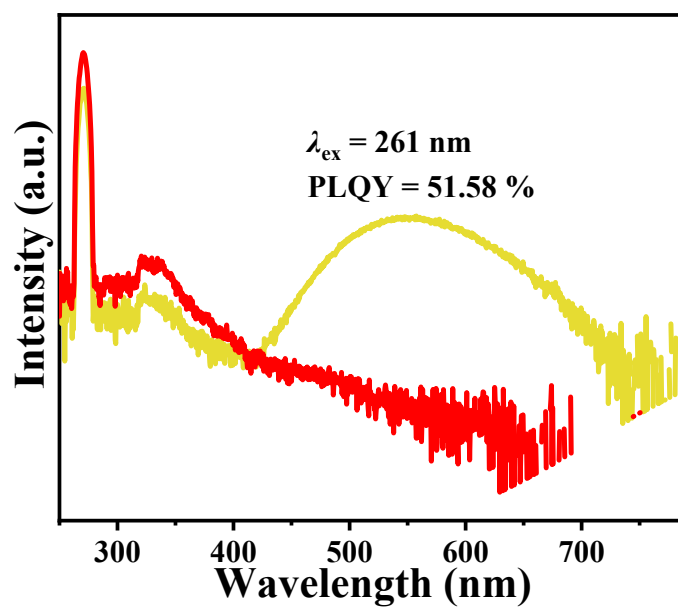

**Figure S4.** The PLQY of  $[1\text{-Me-Pipz}]_2[\text{InCl}_6]\text{Cl}\cdot\text{H}_2\text{O}$  at 300K.

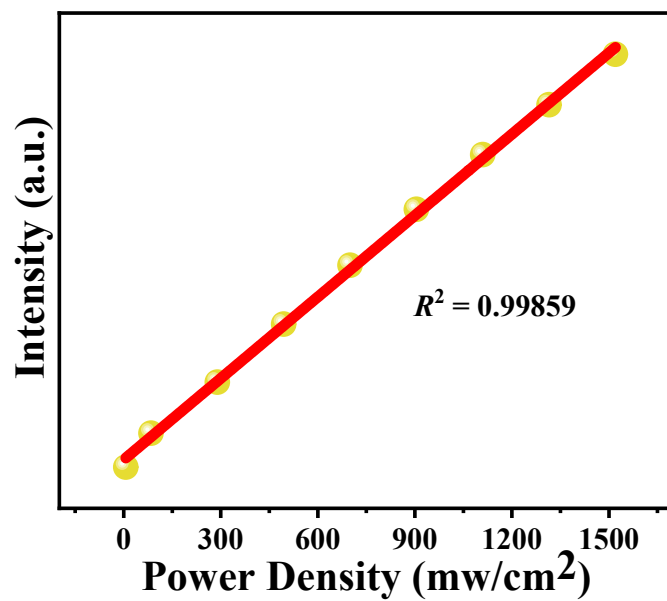

**Figure S5.** The PL emission of [1-Me-Pipz]<sub>2</sub>[InCl<sub>6</sub>]Cl·H<sub>2</sub>O as a function of power density.

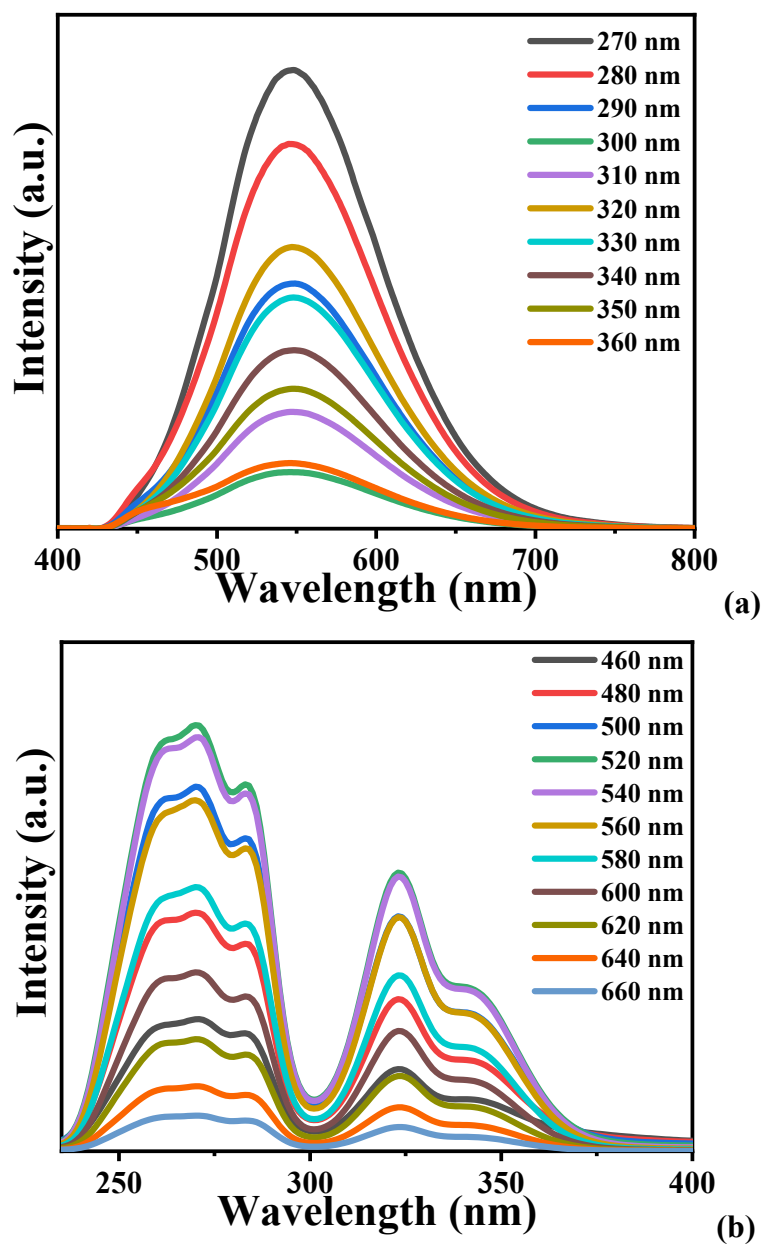

**Figure S6.** The excitation wavelength dependent PL emission spectra (a) and the emission wavelength dependent PL excitation spectra (b) of [1-Me-Pipz]<sub>2</sub>[InCl<sub>6</sub>]Cl·H<sub>2</sub>O.

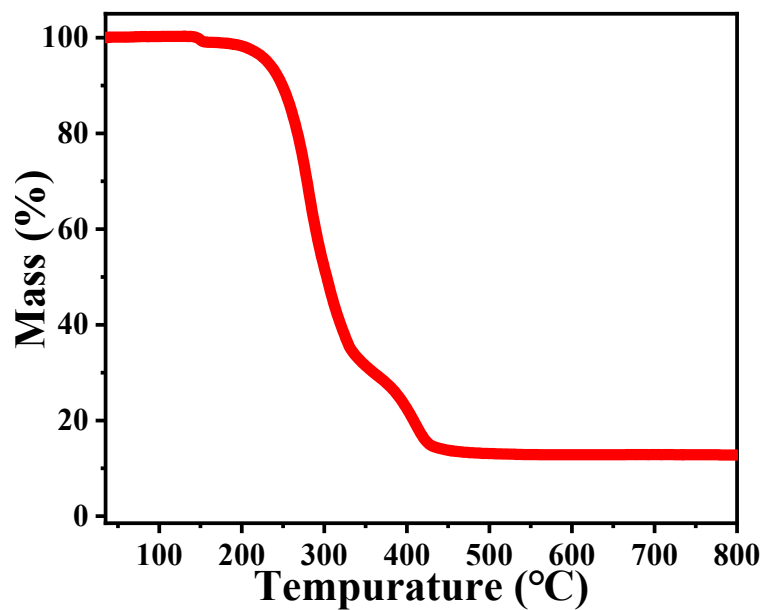

**Figure S7.** The thermogravimetric analysis of  $[1\text{-Me-Pipz}]_2[\text{InCl}_6]\text{Cl}\cdot\text{H}_2\text{O}$ .

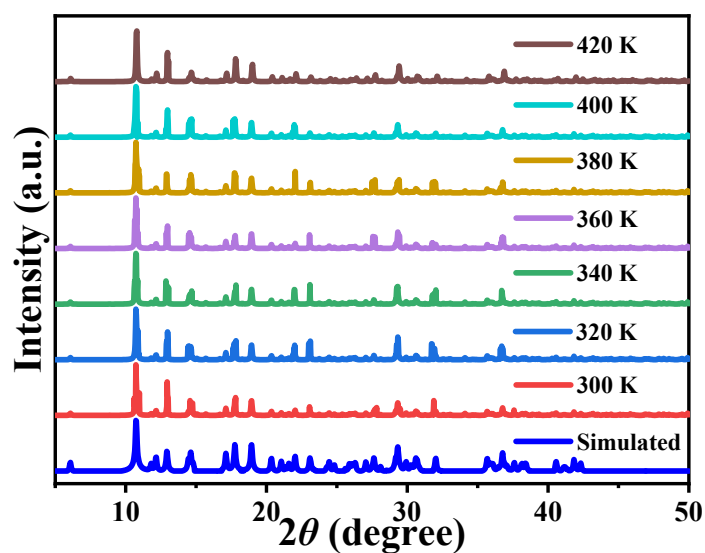

**Figure S8.** The simulated and experimental powder X-ray diffraction (PXRD) patterns of  $[1\text{-Me-Pipz}]_2[\text{InCl}_6]\text{Cl}\cdot\text{H}_2\text{O}$  after continuous heating from 300 K to 420 K.

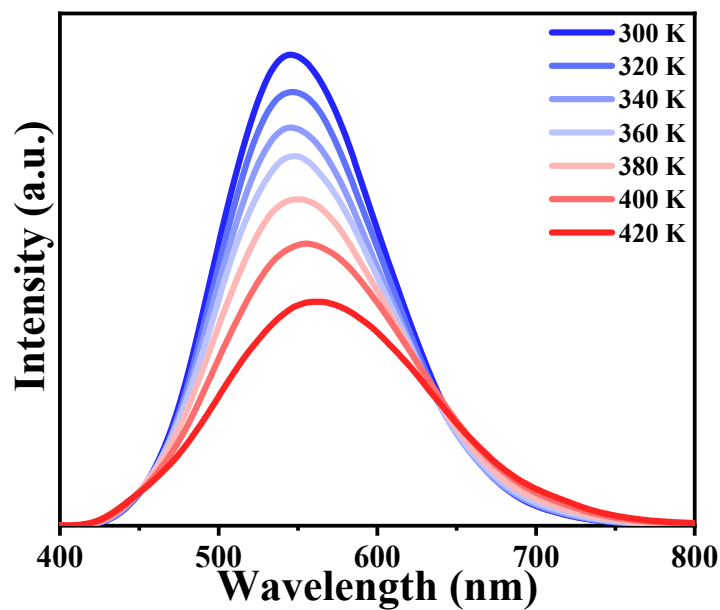

**Figure S9.** The PL emission spectra of  $[1\text{-Me-Pipz}]_2[\text{InCl}_6]\text{Cl}\cdot\text{H}_2\text{O}$  after continuous heating from 300 K to 420 K.

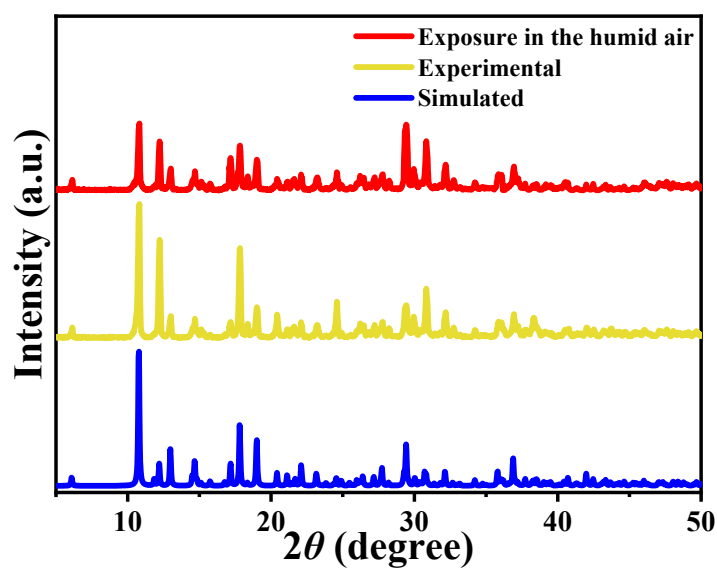

**Figure S10.** The simulated and experimental powder X-ray diffraction (PXRD) patterns of  $[1\text{-Me-Pipz}]_2[\text{InCl}_6]\text{Cl}\cdot\text{H}_2\text{O}$  before and after storing in ambient atmosphere with relative humidity of about 50% for one week.

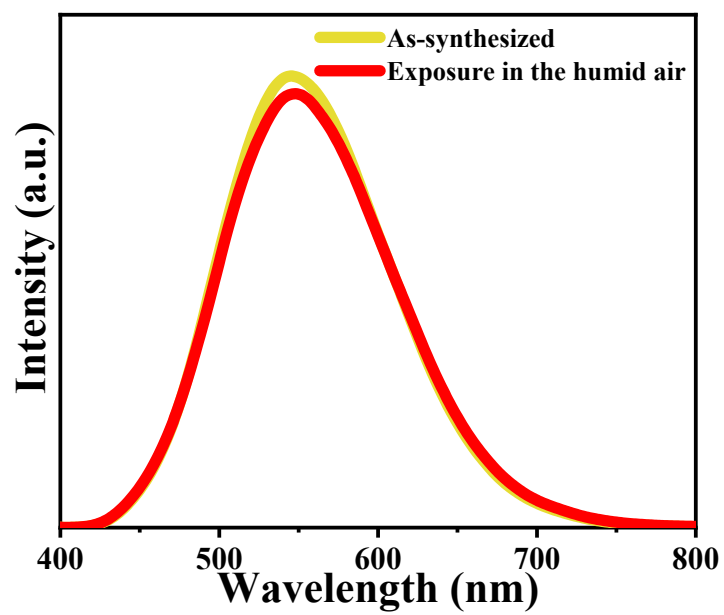

**Figure S11.** The PL spectra of [1-Me-Pipz]<sub>2</sub>[InCl<sub>6</sub>]Cl·H<sub>2</sub>O before and after storing in ambient atmosphere with relative humidity of about 50% for one week.



**Table S1.** Crystal Data and Structural Refinements for [1-Me-Pipz]<sub>2</sub>[InCl<sub>6</sub>]Cl·H<sub>2</sub>O.

| Compound                                                                                 | [1-Me-Pipz] <sub>2</sub> [InCl <sub>6</sub> ]Cl·H <sub>2</sub> O   |
|------------------------------------------------------------------------------------------|--------------------------------------------------------------------|
| chemical formula                                                                         | C <sub>10</sub> H <sub>30</sub> Cl <sub>7</sub> InN <sub>4</sub> O |
| fw                                                                                       | 585.35                                                             |
| Space group                                                                              | <i>Pnma</i>                                                        |
| <i>a</i> /Å                                                                              | 28.989(9)                                                          |
| <i>b</i> /Å                                                                              | 9.949(3)                                                           |
| <i>c</i> /Å                                                                              | 7.723(3)                                                           |
| <i>α</i> /°                                                                              | 90                                                                 |
| <i>β</i> /°                                                                              | 90                                                                 |
| <i>γ</i> /°                                                                              | 90                                                                 |
| <i>V</i> (Å <sup>3</sup> )                                                               | 2227.4(13)                                                         |
| D <sub>calcd</sub> (g·cm <sup>-3</sup> )                                                 | 1.746                                                              |
| Temp (K)                                                                                 | 296.15                                                             |
| <i>μ</i> (mm <sup>-1</sup> )                                                             | 1.907                                                              |
| <i>F</i> (000)                                                                           | 1176.0                                                             |
| Reflections collected                                                                    | 26057                                                              |
| Independent reflections                                                                  | 2964                                                               |
| GOF on <i>F</i> <sup>2</sup>                                                             | 1.017                                                              |
| <sup>a</sup> <i>R</i> <sub>1</sub> , <i>wR</i> <sub>2</sub> ( <i>I</i> > 2σ( <i>I</i> )) | 0.0277/ 0.0586                                                     |
| <sup>b</sup> <i>R</i> <sub>1</sub> , <i>wR</i> <sub>2</sub> (all data)                   | 0.0378/ 0.0620                                                     |

$${}^a R_1 = \sum ||F_o| - |F_c|| / \sum |F_o|. \quad {}^b wR_2 = [\sum w(F_o^2 - F_c^2)^2 / \sum w(F_o^2)^2]^{1/2}.$$

**Table S2.** Selected bond lengths (Å) and bond angles (°) for compound [1-Me-Pipz]<sub>2</sub>[InCl<sub>6</sub>]Cl·H<sub>2</sub>O.

|         |            |                        |           |
|---------|------------|------------------------|-----------|
| In1-Cl1 | 2.5386(11) | In1-Cl3 # <sup>1</sup> | 2.5102(9) |
| In1-Cl2 | 2.4910(11) | In1-Cl4                | 2.5166(9) |
| In1-Cl3 | 2.5102(9)  | In1-Cl4 # <sup>1</sup> | 2.5166(9) |

Symmetry codes: #1: 1+x, 3/2-y, +z

**Table S3.** Hydrogen bonds data for [1-Me-Pipz]<sub>2</sub>[InCl<sub>6</sub>]Cl·H<sub>2</sub>O.

| D-H···A            | d(D-H) | d(H···A) | d(D···A)   | <(DHA) |
|--------------------|--------|----------|------------|--------|
| N(1)-H(1A)···Cl(4) | 0.89   | 2.63     | 3.351(3)   | 139    |
| N(1)-H(1A)···Cl(4) | 0.89   | 2.63     | 3.351(3)   | 139    |
| N(1)-H(1B)···Cl(1) | 0.89   | 2.62     | 3.246(3)   | 128    |
| N(1)-H(1B)···Cl(3) | 0.89   | 2.82     | 3.507(3)   | 135    |
| N(1)-H(1B)···Cl(3) | 0.89   | 2.82     | 3.507(3)   | 135    |
| O(1)-H(1E)···Cl(5) | 0.85   | 2.59     | 3.180(4)   | 127    |
| O(1)-H(1E)···Cl(4) | 0.85   | 2.72     | 3.3059(16) | 127    |
| O(1)-H(1F)···Cl(4) | 0.85   | 2.71     | 3.3059(16) | 128    |
| N(2)-H(2)···O(1)   | 0.98   | 1.77     | 2.731(5)   | 165    |
| N(3)-H(3)···Cl(5)  | 0.98   | 2.05     | 3.016(3)   | 171    |
| N(4)-H(4A)···Cl(3) | 0.89   | 2.61     | 3.330(3)   | 139    |
| N(4)-H(4A)···Cl(3) | 0.89   | 2.61     | 3.330(3)   | 139    |
| N(4)-H(4B)···Cl(2) | 0.89   | 2.68     | 3.276(3)   | 125    |
| N(4)-H(4B)···Cl(4) | 0.89   | 2.81     | 3.506(3)   | 136    |
| N(4)-H(4B)···Cl(4) | 0.89   | 2.81     | 3.506(3)   | 136    |
| C(2)-H(2A)···Cl(3) | 0.97   | 2.81     | 3.681(3)   | 149    |
| C(3)-H(3A)···Cl(3) | 0.96   | 2.70     | 3.544(2)   | 147    |
| C(3)-H(3B)···Cl(3) | 0.96   | 2.63     | 3.544(2)   | 159    |
